# Supplementary material for: A multicenter analysis of GTX chemotherapy in patients with locally advanced and metastatic pancreatic adenocarcinoma
Source: PubMed Central journal article supplement — Cancer Chemother Pharmacol. 2011 Jul 29;69(2):415–24. doi: 10.1007/s00280-011-1704-y (PMC3265723; doi:10.1007/s00280-011-1704-y), 2011-07-29
Supplement: 280_2011_1704_MOESM1_ESM.pdf [file 280_2011_1704_MOESM1_ESM.pdf]

Supplementary Table S1: Patient characteristics by center.

|                                             | All Patients<br>N = 154 | Center 1<br>N = 49 | Center 2<br>N = 28 | Center 3<br>N = 77 | P value |
|---------------------------------------------|-------------------------|--------------------|--------------------|--------------------|---------|
| Age - Median (Range)                        | 62 (37, 83)             | 60 (39, 81)        | 63 (39, 79)        | 62 (37, 83)        | 0.245   |
| Gender - No. (%)                            |                         |                    |                    |                    |         |
| Male                                        | 86 (56)                 | 30 (61)            | 10 (36)            | 46 (60)            | 0.06    |
| Female                                      | 68 (44)                 | 19 (39)            | 18 (64)            | 31 (40)            |         |
| Race - No. (%)                              |                         |                    |                    |                    |         |
| African American                            | 12 (9)                  | 8 (16)             | 1 (7)              | 3 (4)              | 0.047   |
| Caucasian                                   | 120 (86)                | 38 (78)            | 13 (87)            | 69 (91)            |         |
| Hispanic                                    | 3 (2)                   | 2 (4)              | 1 (7)              | 0 (0)              |         |
| Asian                                       | 5 (4)                   | 1 (2)              | 0 (0)              | 4 (5)              |         |
| Missing                                     | 14                      | 0                  | 13                 | 1                  |         |
| Stage - No. (%)                             |                         |                    |                    |                    |         |
| Locally Advanced                            | 37 (24)                 | 18 (37)            | 10 (36)            | 9 (12)             | 0.001   |
| Metastatic                                  | 117 (76)                | 31 (63)            | 18 (64)            | 68 (88)            |         |
| Grade - No. (%)                             |                         |                    |                    |                    |         |
| Well- differentiated                        | 3 (2)                   | 3 (6)              | 0 (0)              | 0 (0)              | 0.366   |
| Moderately- differentiated                  | 31 (20)                 | 11 (22)            | 5 (18)             | 15 (19)            |         |
| Poorly- differentiated                      | 15 (10)                 | 6 (12)             | 2 (7)              | 7 (9)              |         |
| Unknown                                     | 105 (68)                | 29 (59)            | 21 (75)            | 55 (71)            |         |
| ECOG - No. (%)                              |                         |                    |                    |                    |         |
| 0                                           | 44 (29)                 | 20 (41)            | 6 (23)             | 18 (24)            | 0.084   |
| 1                                           | 100 (66)                | 29 (59)            | 19 (73)            | 52 (68)            |         |
| 2                                           | 7 (5)                   | 0 (0)              | 1 (4)              | 6 (8)              |         |
| Missing                                     | 3                       | 0                  | 2                  | 1                  |         |
| Number of Comorbidities - Median (Range)    | 2 (0, 8)                | 2 (0, 8)           | 2 (0, 5)           |                    |         |
| Family History of Cancer - No. (%)          |                         |                    |                    |                    |         |
| Yes                                         | 115 (77)                | 35 (73)            | 13 (52)            | 67 (87)            | 0.001   |
| No                                          | 35 (23)                 | 13 (27)            | 12 (48)            | 10 (13)            |         |
| Missing                                     | 4                       | 1                  | 3                  | 0                  |         |
| Family History of Pancreas Cancer - No. (%) |                         |                    |                    |                    |         |
| Yes                                         | 7 (10)                  | 6 (12)             | 1 (4)              | 0 (NaN)            | 0.412   |
| No                                          | 65 (90)                 | 42 (88)            | 23 (96)            | 0 (NaN)            |         |
| Missing                                     | 82                      | 1                  | 4                  | 77                 |         |
| Number of Cycles - Median (Range)           | 4 (1, 40)               | 4 (1, 27)          | 4 (1, 20)          | 4 (1, 40)          | 0.856   |
| Number of Metastatic Sites - No. (%)        |                         |                    |                    |                    |         |
| 0                                           | 22 (29)                 | 17 (35)            | 5 (19)             | 0 (NaN)            | 0.292   |
| 1                                           | 33 (43)                 | 19 (39)            | 14 (52)            | 0 (NaN)            |         |
| 2                                           | 16 (21)                 | 11 (22)            | 5 (19)             | 0 (NaN)            |         |
| 3                                           | 5 (7)                   | 2 (4)              | 3 (11)             | 0 (NaN)            |         |
| Missing                                     | 78                      | 0                  | 1                  | 77                 |         |
| Prior Chemotherapy - No. (%)                |                         |                    |                    |                    |         |
| No                                          | 79 (51)                 | 34 (69)            | 14 (50)            | 31 (40)            | 0.006   |
| Yes                                         | 75 (49)                 | 15 (31)            | 14 (50)            | 46 (60)            |         |
| Previous Surgery - No. (%)                  |                         |                    |                    |                    |         |
| Yes                                         | 16 (21)                 | 8 (16)             | 8 (29)             | 0 (NaN)            | 0.248   |
| No                                          | 61 (79)                 | 41 (84)            | 20 (71)            | 0 (NaN)            |         |
| Missing                                     | 77                      | 0                  | 0                  | 77                 |         |
| Line of GTX Therapy - No. (%)               |                         |                    |                    |                    |         |
| 1st                                         | 79 (51)                 | 34 (69)            | 14 (50)            | 31 (40)            | 0.037   |
| 2 <sup>nd</sup> or greater                  | 75 (49)                 | 15 (31)            | 14 (50)            | 46 (60)            |         |
| Ascites - No. (%)                           |                         |                    |                    |                    |         |
| Yes                                         | 25 (16)                 | 14 (29)            | 7 (25)             | 4 (5)              | < 0.001 |
| No                                          | 129 (84)                | 35 (71)            | 21 (75)            | 73 (95)            |         |

Supplementary Table S2: Frequency of toxicities, overall and by center.

|                                                           | All Patients<br>N = 154 | Center 1<br>N = 49 | Center 2<br>N = 28 | Center 3<br>N = 77 | P value |
|-----------------------------------------------------------|-------------------------|--------------------|--------------------|--------------------|---------|
| <b>Any Grade 3/4 Hematological Toxicity - No. (%)</b>     |                         |                    |                    |                    |         |
| No                                                        | 90 (59)                 | 25 (52)            | 16 (59)            | 49 (64)            | 0.468   |
| Yes                                                       | 62 (41)                 | 23 (48)            | 11 (41)            | 28 (36)            |         |
| Missing                                                   | 2                       | 1                  | 1                  | 0                  |         |
| <b>Thrombocytopenia- No. (%)</b>                          |                         |                    |                    |                    |         |
| Grade 1/2                                                 | 80 (68)                 | 28 (58)            | 18 (67)            | 34 (79)            | < 0.001 |
| Grade 3/4                                                 | 15 (13)                 | 5 (10)             | 1 (4)              | 9 (21)             |         |
| None                                                      | 23 (19)                 | 15 (31)            | 8 (30)             | 0 (0)              |         |
| Missing                                                   | 36                      | 1                  | 1                  | 34                 |         |
| <b>Neutropenia - No. (%)</b>                              |                         |                    |                    |                    |         |
| Grade 1/2                                                 | 41 (36)                 | 10 (21)            | 8 (30)             | 23 (59)            | < 0.001 |
| Grade 3/4                                                 | 39 (34)                 | 17 (35)            | 9 (33)             | 13 (33)            |         |
| None                                                      | 34 (30)                 | 21 (44)            | 10 (37)            | 3 (8)              |         |
| Missing                                                   | 40                      | 1                  | 1                  | 38                 |         |
| <b>Leucopenia - No. (%)</b>                               |                         |                    |                    |                    |         |
| Grade 1/2                                                 | 69 (57)                 | 24 (50)            | 19 (70)            | 26 (58)            | 0.124   |
| Grade 3/4                                                 | 35 (29)                 | 13 (27)            | 6 (22)             | 16 (36)            |         |
| None                                                      | 16 (13)                 | 11 (23)            | 2 (7)              | 3 (7)              |         |
| Missing                                                   | 34                      | 1                  | 1                  | 32                 |         |
| <b>Anemia - No. (%)</b>                                   |                         |                    |                    |                    |         |
| Grade 1/2                                                 | 129 (85)                | 41 (85)            | 24 (89)            | 64 (83)            | 0.99    |
| Grade 3/4                                                 | 19 (12)                 | 6 (12)             | 3 (11)             | 10 (13)            |         |
| None                                                      | 4 (3)                   | 1 (2)              | 0 (0)              | 3 (4)              |         |
| Missing                                                   | 2                       | 1                  | 1                  | 0                  |         |
| <b>Any Grade 3/4 Non-Hematological Toxicity - No. (%)</b> |                         |                    |                    |                    |         |
| No                                                        | 138 (91)                | 44 (92)            | 25 (96)            | 69 (90)            | 0.632   |
| Yes                                                       | 13 (9)                  | 4 (8)              | 1 (4)              | 8 (10)             |         |
| Missing                                                   | 3                       | 1                  | 2                  | 0                  |         |
| <b>Elevated ALT - No. (%)</b>                             |                         |                    |                    |                    |         |
| Grade 1/2                                                 | 75 (50)                 | 24 (50)            | 10 (38)            | 41 (53)            | 0.316   |
| Grade 3/4                                                 | 9 (6)                   | 4 (8)              | 0 (0)              | 5 (6)              |         |
| None                                                      | 67 (44)                 | 20 (42)            | 16 (62)            | 31 (40)            |         |
| Missing                                                   | 3                       | 1                  | 2                  | 0                  |         |
| <b>Bilirubin - No. (%)</b>                                |                         |                    |                    |                    |         |
| Grade 1/2                                                 | 35 (35)                 | 9 (19)             | 8 (31)             | 18 (72)            | < 0.001 |
| Grade 3/4                                                 | 5 (5)                   | 0 (0)              | 1 (4)              | 4 (16)             |         |
| None                                                      | 59 (60)                 | 39 (81)            | 17 (65)            | 3 (12)             |         |
| Missing                                                   | 55                      | 1                  | 2                  | 52                 |         |
| <b>Hospitalizations - No. (%)</b>                         |                         |                    |                    |                    |         |
| None                                                      | 51 (67)                 | 33 (69)            | 18 (64)            | 0 (NaN)            | 0.801   |
| 1 or more                                                 | 25 (33)                 | 15 (31)            | 10 (36)            | 0 (NaN)            |         |
| Missing                                                   | 78                      | 1                  | 0                  | 77                 |         |

Supplementary Table S3: Adjusted odds ratios for the risk of grade 3/4 toxicity.

|                                     | No Grade 3/4 Toxicities<br>N = 83 | Grade 3/4 Toxicities<br>N = 69 | Adjusted OR | 95% CI      | P     |
|-------------------------------------|-----------------------------------|--------------------------------|-------------|-------------|-------|
| <b>Stage - No. (%)</b>              |                                   |                                |             |             |       |
| Locally Advanced                    | 15 (18)                           | 21 (30)                        | 1.00        | -           |       |
| Metastatic                          | 68 (82)                           | 48 (70)                        | 0.57        | (0.24,1.33) | 0.192 |
| <b>Stage/GTX - No. (%)</b>          |                                   |                                |             |             |       |
| Locally Advanced                    | 15 (18)                           | 21 (30)                        | 1.00        | -           |       |
| Mets, 1st Line                      | 33 (40)                           | 17 (25)                        | 0.43        | (0.17,1.09) | 0.143 |
| Mets, 2nd, Line                     | 35 (42)                           | 31 (45)                        | 0.81        | (0.3,2.13)  |       |
| <b>Grade - No. (%)</b>              |                                   |                                |             |             |       |
| Well or moderately differentiated   | 18 (22)                           | 16 (23)                        | 1.00        | -           |       |
| Poorly- differentiated or Unknown   | 65 (78)                           | 53 (77)                        | 1.11        | (0.48,2.54) | 0.807 |
| <b>ECOG - No. (%)</b>               |                                   |                                |             |             |       |
| 0                                   | 24 (29)                           | 19 (28)                        | 1.00        | -           |       |
| 1+                                  | 58 (71)                           | 48 (72)                        | 1.16        | (0.53,2.54) | 0.709 |
| <b>Prior Chemotherapy - No. (%)</b> |                                   |                                |             |             |       |
| No                                  | 47 (57)                           | 31 (45)                        | 1.00        | -           |       |
| Yes                                 | 36 (43)                           | 38 (55)                        | 2.01        | (0.97,4.16) | 0.057 |
| <b>Previous Surgery - No. (%)</b>   |                                   |                                |             |             |       |
| Yes                                 | 8 (21)                            | 7 (19)                         | 1.00        | -           |       |
| No                                  | 31 (79)                           | 29 (81)                        | 1.37        | (0.33,5.58) | 0.663 |
| <b>Ascites - No. (%)</b>            |                                   |                                |             |             |       |
| Yes                                 | 15 (18)                           | 10 (14)                        | 1.00        | -           |       |
| No                                  | 68 (82)                           | 59 (86)                        | 1.32        | (0.49,3.56) | 0.579 |
| <b>Hospitalizations - No. (%)</b>   |                                   |                                |             |             |       |
| None                                | 28 (72)                           | 23 (64)                        | 1.00        | -           |       |
| 1 or more                           | 11 (28)                           | 13 (36)                        | 1.36        | (0.45,4.1)  | 0.587 |

Supplementary Table S4: Estimates of OS (time from start of GTX therapy to death) for patients who received their 2nd+ line of GTX. Values are OS [95% CI].

|                                   | N  | Median OS<br>(months) | 1y OS          | HR   | 95% CI       | P     |
|-----------------------------------|----|-----------------------|----------------|------|--------------|-------|
| All Patients                      | 75 | 5.7                   | 32 [22, 46]    |      |              |       |
| All Patients, by Staging          |    |                       |                |      |              |       |
| LAPC                              | 8  | 16.17                 | 64 [34, 100]   | 1.00 | -            |       |
| Mets                              | 67 | 5.67                  | 29 [19, 44]    | 0.91 | (0.18,4.51)  | 0.905 |
| Grade                             |    |                       |                |      |              |       |
| Well or moderately differentiated | 19 | 15.97                 | 57 [37, 88]    | 1.00 | -            |       |
| Poorly- differentiated or Unknown | 56 | 5.67                  | 24 [14, 40]    | 1.28 | (0.61,2.68)  | 0.518 |
| ECOG                              |    |                       |                |      |              |       |
| 0                                 | 16 | 12.4                  | 57 [36, 91]    | 1.00 | -            |       |
| 1+                                | 57 | 5.67                  | 25 [15, 42]    | 1.69 | (0.8,3.54)   | 0.167 |
| Previous Surgery                  |    |                       |                |      |              |       |
| No                                | 17 | 9.13                  | 30 [12, 75]    | 0.96 | -            |       |
| Yes                               | 12 | 17.23                 | 63 [21, 100]   | 0.25 | (0.06,0.96)  | 0.044 |
| Hospitalizations                  |    |                       |                |      |              |       |
| None                              | 19 | 10.47                 | 45 [25, 82]    | 1.00 | -            |       |
| 1 or more                         | 10 | 11.93                 | 47 [21, 100]   | 1.06 | (0.23,4.96)  | 0.941 |
| Any Grade 3/4 Toxicity            |    |                       |                |      |              |       |
| No                                | 36 | 5.4                   | 20 [10, 41]    | 1.00 | -            |       |
| Yes                               | 38 | 7.47                  | 44 [29, 67]    | 0.47 | (0.25,0.9)   | 0.022 |
| Family history of cancer          |    |                       |                |      |              |       |
| No                                | 16 | 7.47                  | 34 [16, 73]    | 1.00 | -            |       |
| Yes                               | 58 | 5.7                   | 32 [21, 49]    | 0.50 | (0.21,1.17)  | 0.109 |
| Comorbidities                     |    |                       |                |      |              |       |
| None                              | 5  | 10.53                 | 25 [5, 100]    | 1.00 | -            |       |
| 1 or more                         | 24 | 12.4                  | 52 [33, 82]    | 0.24 | (0.01,6.74)  | 0.404 |
| Neutropenia                       |    |                       |                |      |              |       |
| No                                | 12 | 8.93                  | 17 [3, 81]     | 1.00 | -            |       |
| Yes                               | 38 | 13.23                 | 53 [37, 75]    | 0.37 | (0.14,1)     | 0.051 |
| Elevated ALT                      |    |                       |                |      |              |       |
| No                                | 43 | 5.4                   | 28 [16, 49]    | 1.00 | -            |       |
| Yes                               | 31 | 7.73                  | 39 [24, 62]    | 0.77 | (0.41,1.45)  | 0.42  |
| Change in CA19 from baseline      |    |                       |                |      |              |       |
| <25%                              | 20 | 4.87                  | 37 [19, 74]    | 1.00 | -            |       |
| 25-50%                            | 7  | 8.9                   | 50 [22, 100]   | 0.85 | (0.22,3.36)  | 0.709 |
| 50-75%                            | 6  | 7.73                  | 20 [3, 100]    | 1.29 | (0.36,4.57)  |       |
| >75%                              | 16 | 8.5                   | 49 [29, 81]    | 0.64 | (0.24,1.73)  |       |
| RECIST based response             |    |                       |                |      |              |       |
| Partial Response                  | 2  | 25.65                 | 100 [100, 100] | 1.00 | -            |       |
| Stable Disease                    | 41 | 9.47                  | 44 [29, 66]    | 2.06 | [0.43, 9.75] |       |
| Progressive Disease               | 27 | 3.93                  | 13 [5, 38]     | 5.03 | [1.00, 25.3] | 0.021 |
| Missing                           | 5  | 1.83                  | 0 -            |      |              |       |

LAPC – Locally-advanced pancreatic cancer
